# Supplementary material
Source: Springer Nature journal article supplement (https://www.springermedizin.de/resource/supplementary/13019_2013_1586_MOESM3_ESM.pdf/9639246)

**A**

Finger Ring

Handle

Stent Graft

**B**

Stent Graft

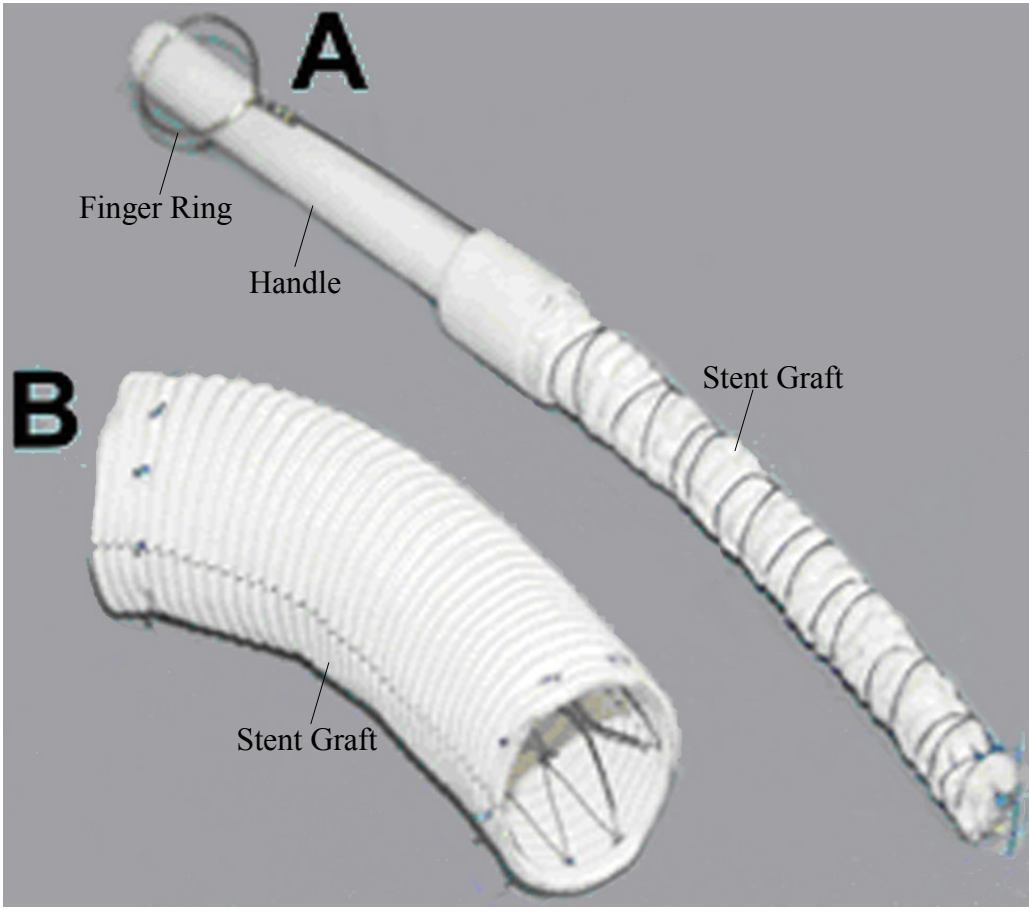

Supplement: MOESM3 [file 9639246]
